# Supplementary material for: Applying deep learning to iterative screening of medium-sized molecules for protein–protein interaction-targeted drug discovery
Source: Royal Society of Chemistry journal article supplement (doi:10.1039/d3cc01283b), 2023-01-01
Supplement: d3cc01283b2.pdf [file d3cc01283b2.pdf]

| Comp<br>ound | Image                                                                              | TR-<br>FRET<br>(Keap1<br>/Nrf2)<br>(%) | TR-<br>FRET<br>(Bcl6/F<br>1325)<br>(%) | Max<br>similarit<br>y to 1st<br>assay<br>actives | Max<br>similarit<br>y to DB<br>actives | SMILES                                                                                     | cluster<br>ID | DNN-<br>hybrid | DNN-<br>hybrid-<br>PI | RF-PA | RF-DB-<br>PI | RF-DB-<br>TI | LF dG  |
|--------------|------------------------------------------------------------------------------------|----------------------------------------|----------------------------------------|--------------------------------------------------|----------------------------------------|--------------------------------------------------------------------------------------------|---------------|----------------|-----------------------|-------|--------------|--------------|--------|
| 1            | 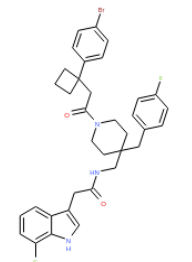  | 36.1                                   | NI                                     | 0.44                                             | 0.19                                   | <chem>Fc1ccc(CC2(CNC(=O)Cc3c[nH]c4c(F)cccc34)CCN(CC2)C(=O)CC5(CCC5)c6ccc(Br)cc6)cc1</chem> | 28            | 45             | NS                    | 4     | NS           | NS           | -13.03 |
| 2            |   | 32.9                                   | NI                                     | 0.43                                             | 0.20                                   | <chem>COc1ccc(cc1)C2(CNC(=O)Cc3c[nH]c4c(F)cccc34)CCN(CC2)C(=O)CC5(CC5)c6cccc(Br)c6</chem>  | 28            | 3              | 11                    | 11    | 36           | NS           | -12.32 |
| 3            |  | 32.1                                   | NI                                     | 0.50                                             | 0.17                                   | <chem>Fc1cccc2[nH]cc(CC(=O)NCC3(Cc4cccc(Cl)c4)CCN(CC3)C(=O)C5(CC5)c6ccc(Br)cc6)c12</chem>  | 4             | NS             | NS                    | 9     | NS           | NS           | -12.55 |

|   |                                                                                     |      |    |      |      |                                                                                                 |    |    |    |     |    |    |        |
|---|-------------------------------------------------------------------------------------|------|----|------|------|-------------------------------------------------------------------------------------------------|----|----|----|-----|----|----|--------|
| 4 | 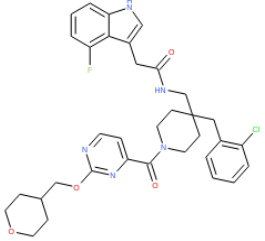   | 30.4 | NI | 0.36 | 0.12 | <chem>Fc1cccc2[nH]cc(CC(=O)NCC3(Cc4ccccc4Cl)CCN(CC3)C(=O)c5ccnc(OCC6CCOCC6)n5)c12</chem>        | 17 | 2  | 3  | 7   | NS | NS | -12.44 |
| 5 |    | 28.2 | NI | 0.29 | 0.12 | <chem>CN1CCc2cccc(C(=O)NCC3(Cc4ccccc4Cl)CCN(CC3)C(=O)c5ccnc(OCC6CCOCC6)n5)c12</chem>            | 17 | 11 | 5  | 100 | NS | NS | -12.31 |
| 6 |    | 28.1 | NI | 0.23 | 0.13 | <chem>CN1CCc2ccc(cc12)C(=O)NCC3(Cc4ccccc4Cl)CCN(CC3)C(=O)c5cccnc5OCC6CCOCC6</chem>              | 20 | 39 | 27 | NS  | NS | NS | NA     |
| 7 |  | 28.0 | NI | 0.40 | 0.15 | <chem>COc1cccc2c(CC(=O)NCC3(CCN(CC3)C(=O)C4(Cc5cccc(F)c5)CCC(F)(F)CC4)c6ccccc6F)c[nH]c12</chem> | 28 | 72 | 53 | 12  | 82 | NS | NA     |

|    |                                                                                     |      |    |      |      |                                                                                                        |    |    |    |    |    |    |    |
|----|-------------------------------------------------------------------------------------|------|----|------|------|--------------------------------------------------------------------------------------------------------|----|----|----|----|----|----|----|
| 8  | 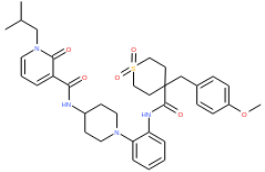   | 26.7 | NI | 0.50 | 0.19 | <chem>COc1ccc(CC2(CC(S(=O)(=O)CC2)C(=O)Nc3ccccc3N4CCC(CC4)NC(=O)C5=CC=CN(CC(C)C)C5=O)cc1</chem>        | 12 | 52 | 56 | 46 | 12 | 77 | NA |
| 9  |    | 26.6 | NI | 0.46 | 0.13 | <chem>CC(C)Oc1cncc(n1)C(=O)NC2CCN(CC2)C(=O)c3ccc(cc3)C(=O)N[C@@H]4C[C@H](CC4)N5Cc6cc(F)ccc6C5=O</chem> | 25 | 76 | 52 | NS | NS | NS | NA |
| 10 |   | 25.5 | NI | 0.66 | 0.18 | <chem>Cc1ccc2c(CC(=O)NCC3(Cc4cccc(Cl)c4)CCN(CC3)C(=O)C5(CC5)c6ccc(Br)cc6)c[nH]c2c1</chem>              | 4  | 82 | NS | 2  | NS | NS | NA |
| 11 |  | 22.6 | NI | 0.28 | 0.12 | <chem>CC(C)c1cc2ncc(cn2n1)C(=O)NCC3(Cc4ccccc4Cl)CN(CC3)C(=O)c5ccnc(OCC6CCOCC6)n5</chem>                | 17 | 8  | 4  | 47 | NS | NS | NA |

|    |                                                                                     |      |    |      |      |                                                                                            |    |    |    |    |    |    |    |
|----|-------------------------------------------------------------------------------------|------|----|------|------|--------------------------------------------------------------------------------------------|----|----|----|----|----|----|----|
| 12 | 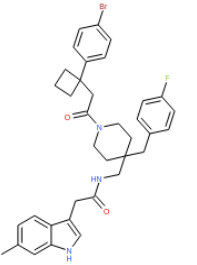   | 21.1 | NI | 0.56 | 0.17 | <chem>Cc1ccc2c(CC(=O)NCC3(Cc4ccc(F)cc4)CCN(CC3)C(=O)CC5(CCC5)c6ccc(Br)cc6)c[nH]c2c1</chem> | 4  | 41 | NS | 1  | NS | NS | NA |
| 13 |    | 20.0 | NI | 0.31 | 0.17 | <chem>COc1cccc(c1)C2(CNC(=O)Cc3ccc4[nH]ccc4n3)CCN(CC2)C(=O)C5(CCC5)c6ccc(Br)cc6</chem>     | 16 | 15 | 47 | NS | NS | NS | NA |
| 14 |    | 20.0 | NI | 0.26 | 0.13 | <chem>CN1CCc2ccc(cc12)C(=O)NCC3(Cc4cccc(Cl)c4)CCN(CC3)C(=O)c5nccc(OC6CCOCC6)n5</chem>      | 20 | 35 | 42 | NS | NS | NS | NA |
| 15 |  | 19.7 | NI | 0.30 | 0.14 | <chem>Brc1ccc2c(CC(=O)NCc3ccnc(OCC4CCOCC4)n3)c[nH]c2c1</chem>                              | 19 | NS | NS | 8  | NS | NS | NA |

|    |                                                                                     |      |     |      |      |                                                                                               |    |    |    |    |    |    |    |
|----|-------------------------------------------------------------------------------------|------|-----|------|------|-----------------------------------------------------------------------------------------------|----|----|----|----|----|----|----|
| 16 | 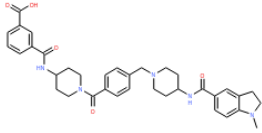   | 19.5 | 4.6 | 0.23 | 0.16 | <chem>CN1CCc2cc(ccc12)C(=O)NC3CCN(Cc4ccc(cc4)C(=O)N5CCC(CC5)NC(=O)c6cccc(c6)C(=O)O)CC3</chem> | 13 | NS | NS | NS | 21 | 8  | NA |
| 17 |    | 19.4 | 5.8 | 0.25 | 0.17 | <chem>COc1ccc(CC2(CNC(=O)C3CCCC(n3)C(C)C)CCN(C2)C(=O)c4ncccc4OCC5CCOCC5)cc1</chem>            | 11 | NS | NS | NS | 87 | NS | NA |
| 18 |   | 18.9 | 5.8 | 0.26 | 0.19 | <chem>COc1ccc(CC2(CNC(=O)C3(CCC3)c4cccc(OC)c4)CN(CC2)C(=O)c5ncccc5OCC6CCOCC6)cc1</chem>       | 11 | NS | NS | NS | 83 | NS | NA |
| 19 |  | 18.7 | NI  | 0.29 | 0.13 | <chem>CN1CCc2cc(ccc12)C(=O)NCC3(Cc4cccc4Cl)CCN(CC3)C(=O)c5ccnc(OCC6CCOCC6)n5</chem>           | 17 | 10 | 13 | 80 | NS | NS | NA |

|    |                                                                                     |      |      |      |      |                                                                                                          |    |     |    |    |    |    |    |
|----|-------------------------------------------------------------------------------------|------|------|------|------|----------------------------------------------------------------------------------------------------------|----|-----|----|----|----|----|----|
| 20 | 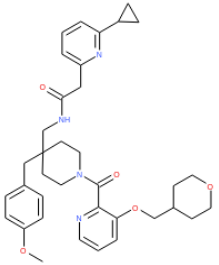   | 17.8 | 5.2  | 0.25 | 0.17 | <chem>COc1ccc(CC2(CNC(=O)C<br/>c3cccc(n3)C4CC4)CCN(C<br/>C2)C(=O)c5ncccc5OCC6<br/>CCOCC6)cc1</chem>      | 11 | NS  | NS | NS | 84 | NS | NA |
| 21 |    | 17.8 | NI   | 0.27 | 0.12 | <chem>Clc1cccc1CC2(CNC(=O)<br/>c3ccc4nc(nn4c3)C5CC5)<br/>CCN(CC2)C(=O)c6ccnc(<br/>OCC7CCOCC7)n6</chem>   | 17 | 53  | NS | 55 | NS | NS | NA |
| 22 |   | 17.8 | NI   | 0.35 | 0.14 | <chem>Fc1ccc(CC2(CNC(=O)Cc<br/>3ccc4[nH]ccc4n3)CCN(C<br/>C2)C(=O)CC5(CCC5)c6cc<br/>c(Br)cc6)cc1</chem>   | 16 | 73  | NS | 45 | NS | NS | NA |
| 23 |  | 17.7 | 11.3 | 0.39 | 0.16 | <chem>Cc1ccc(cc1)C2(CC(=O)N<br/>c3c(F)cccc3N4CCC(CC4)<br/>C(=O)NCc5cccc(c5)N6CC<br/>CNC6=O)CCOCC2</chem> | 6  | 101 | NS | 66 | NS | NS | NA |

|    |                                                                                     |      |     |      |      |                                                                                               |    |    |    |    |    |    |    |
|----|-------------------------------------------------------------------------------------|------|-----|------|------|-----------------------------------------------------------------------------------------------|----|----|----|----|----|----|----|
| 24 | 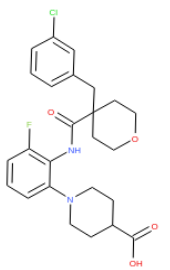   | 17.6 | 0.8 | 0.67 | 0.22 | <chem>OC(=O)C1CCN(CC1)c2ccc(F)c2NC(=O)C3(Cc4ccc(Cl)c4)CCOCC3</chem>                           | 6  | 81 | NS | 32 | 58 | NS | NA |
| 25 |    | 17.2 | 5.7 | 0.25 | 0.17 | <chem>COc1ccc(cc1)C2(CNC(=O)c3ccccc3C(=O)N4CCC(CC4)NC(=O)c5ccncc5O)C(C)C)CCNCC2</chem>        | 10 | 56 | NS | NS | 30 | NS | NA |
| 26 |   | 16.7 | 9.2 | 0.24 | 0.13 | <chem>FC(F)(F)c1ccc(cc1)C2(C(=O)N3CCC4(CC3)CCN(CC(=O)N4)C(=O)c5ccnc(OCC6CCOCC6)n5)CCC2</chem> | 21 | NS | NS | 58 | NS | NS | NA |
| 27 |  | 16.6 | NI  | 0.26 | 0.14 | <chem>CN1CCc2c1cccc2C(=O)NCC3(Cc4cccc(Cl)c4)CCN(CC3)C(=O)c5nccc(OCC6CCOCC6)n5</chem>          | 20 | 33 | 41 | NS | NS | NS | NA |

|    |                                                                                     |      |      |      |      |                                                                                        |    |    |    |    |    |    |    |
|----|-------------------------------------------------------------------------------------|------|------|------|------|----------------------------------------------------------------------------------------|----|----|----|----|----|----|----|
| 28 | 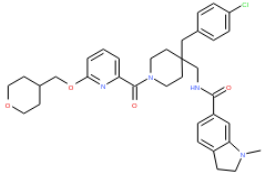   | 16.4 | NI   | 0.31 | 0.15 | <chem>CN1CCc2ccc(cc12)C(=O)NCC3(Cc4ccc(Cl)cc4)CCN(CC3)C(=O)c5cccc(OC6CCOCC6)n5</chem>  | 20 | 37 | 26 | NS | NS | NS | NA |
| 29 |    | 16.4 | 13.0 | 0.24 | 0.16 | <chem>COc1cccc(CC2(CNC(=O)c3cncc(OC4CCC4)n3)CCN(CC2)C(=O)c5ccncc5OC6CCOCC6)c1</chem>   | 26 | 91 | NS | NS | NS | 69 | NA |
| 30 |    | 16.3 | 1.3  | 0.40 | 0.15 | <chem>COc1cccc1CC2(CNC(=O)Cc3cc(ccn3)C(C)C)CCN(CC2)C(=O)C4(Cc5cccc(Cl)c5)CCNCC4</chem> | 24 | NS | NS | 59 | NS | NS | NA |
| 31 |  | 16.2 | 3.0  | 0.28 | 0.13 | <chem>CN1CCc2c1cccc2C(=O)NCC3(Cc4cccc4Cl)CCN(CC3)C(=O)c5ccnc(OCC6CCOCC6)n5</chem>      | 17 | 7  | 8  | NS | NS | NS | NA |



|    |                                                                                     |      |      |      |      |                                                                                             |    |     |    |    |    |    |    |
|----|-------------------------------------------------------------------------------------|------|------|------|------|---------------------------------------------------------------------------------------------|----|-----|----|----|----|----|----|
| 32 | 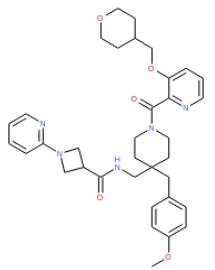   | 16.1 | 10.2 | 0.26 | 0.18 | <chem>COc1ccc(CC2(CNC(=O)C3CN(C3)c4cccn4)CCN(CC2)C(=O)c5ncccc5OCC6CCOCC6)cc1</chem>         | 11 | NS  | NS | NS | 39 | NS | NA |
| 33 |    | 16.0 | NI   | 0.32 | 0.15 | <chem>Clc1ccc(CC2(CNC(=O)c3ccncc3N4CCCCC4)CCN(CC2)C(=O)c5cccc(OCC6CCOCC6)n5)cc1</chem>      | 17 | 108 | NS | NS | NS | NS | NA |
| 34 |   | 15.9 | 8.7  | 0.26 | 0.17 | <chem>COc1ccc(CC2(CNC(=O)C3(CCC3)c4ccccc4C)CCN(CC2)C(=O)c5ncccc5OCC6CCOCC6)cc1</chem>       | 11 | NS  | NS | NS | 68 | NS | NA |
| 35 |  | 15.9 | 2.4  | 0.19 | 0.13 | <chem>FC(F)(F)c1cc(ccc1OC2COC2)C(=O)N3CCC4(CCN(CC(=O)N4)C(=O)c5cncc(OCC6CCOCC6)c5)C3</chem> | 3  | NS  | NS | NS | NS | 51 | NA |

|    |                                                                                     |      |     |      |      |                                                                                          |    |    |    |    |    |    |    |
|----|-------------------------------------------------------------------------------------|------|-----|------|------|------------------------------------------------------------------------------------------|----|----|----|----|----|----|----|
| 36 | 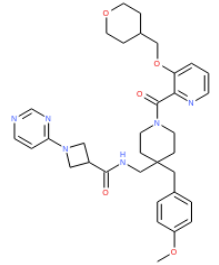   | 15.6 | NI  | 0.28 | 0.17 | <chem>COc1ccc(CC2(CNC(=O)C3CN(C3)c4ccn4)CCN(C2)C(=O)c5ncccc5OCC6CCOCC6)cc1</chem>        | 11 | NS | NS | NS | 48 | NS | NA |
| 37 |    | 15.5 | 4.5 | 0.30 | 0.16 | <chem>O=C(Nc1cccnc1N2CCC(C2)NC(=O)c3ccncc3OCC4CCC4)c5cccc(c5)S(=O)(=O)NC6CCNCC6</chem>   | 23 | 66 | NS | NS | 32 | 75 | NA |
| 38 |    | 15.3 | 7.2 | 0.28 | 0.12 | <chem>CC(C)c1cnn2cc(cnc12)C(=O)NCC3(Cc4ccccc4Cl)CCN(CC3)C(=O)c5ccnc(OCC6CCOCC6)n5</chem> | 17 | 31 | 28 | 49 | NS | NS | NA |
| 39 |  | 15.3 | 0.8 | 0.27 | 0.11 | <chem>Cc1nc2ccc(cn2n1)C(=O)NCC3(Cc4ccccc4Cl)CCN(C3)C(=O)c5ccnc(OCC6CCOCC6)n5</chem>      | 17 | 47 | 25 | NS | NS | NS | NA |

|    |                                                                                     |      |      |      |      |                                                                                               |    |    |    |    |    |    |    |
|----|-------------------------------------------------------------------------------------|------|------|------|------|-----------------------------------------------------------------------------------------------|----|----|----|----|----|----|----|
| 40 | 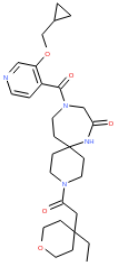   | 15.2 | 3.9  | 0.16 | 0.13 | <chem>CCC1(CC(=O)N2CCC3(C C2)CCN(CC(=O)N3)C(=O )c4ccncc4OCC5CC5)CC OCC1</chem>                | 27 | NS | NS | NS | NS | 57 | NA |
| 41 |    | 51.9 | 63.2 | 0.18 | 0.15 | <chem>CN1CCN(CC1)c2cccnc2N C(=O)c3cccc(CN4CCC(C C4)NC(=O)c5cccc5OCC 6CCOCC6)c3</chem>         | 8  | NS | NS | NS | NS | 74 | NA |
| 42 |    | 19.1 | 23.5 | 0.25 | 0.20 | <chem>COc1ccc(cc1)C(C)(C)CC( =O)NC2CCN(CC2)C(=O)c 3cccc3C(=O)NCC4(CCN CC4)c5ccc(OC)cc5</chem> | 10 | 12 | NS | NS | 15 | NS | NA |
| 43 |  | 17.0 | 17.1 | 0.27 | 0.12 | <chem>Clc1cccc1CC2(CNC(=O) c3cnc4c(cnn4c3)C5CC5) CCN(CC2)C(=O)c6ccnc( OCC7CCOCC7)n6</chem>    | 17 | 51 | NS | 53 | NS | NS | NA |

|    |                                                                                   |      |      |      |      |                                                                                                     |    |    |    |    |    |    |    |
|----|-----------------------------------------------------------------------------------|------|------|------|------|-----------------------------------------------------------------------------------------------------|----|----|----|----|----|----|----|
| 44 | 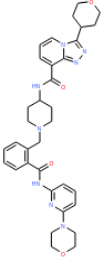 | 15.9 | 23.7 | 0.39 | 0.11 | <chem>O=C(NC1CCN(Cc2ccccc2C(=O)Nc3cccc(n3)N4CCOCC4)CC1)c5cccn6c(nnc56)C7CCOCC7</chem>               | 29 | NS | NS | NS | NS | 79 | NA |
| 45 |  | 15.6 | 33.2 | 0.25 | 0.19 | <chem>COc1ccc2OCC3(CCN(CC3)C(=O)c4cccc(CN[C@@H]5CC[C@H](CC5)NC(=O)c6cccc(Nc7ccnc7)n6)c4)c2c1</chem> | 15 | 87 | NS | NS | NS | NS | NA |
